# Supplementary material
Source: PubMed Central journal article supplement (PMC2962489)
Supplement: supp_M110.159897_FLEC_PROP_Supplementary_Data.pdf [file supp_M110.159897_FLEC_PROP_Supplementary_Data.pdf]

**OVERLAPPING BINDING SITES OF STRUCTURALLY DIFFERENT  
ANTIARRHYTHMICS FLECAINIDE AND PROPAFENONE IN THE SUBUNIT  
INTERFACE OF POTASSIUM CHANNEL Kv2.1\***

**Michael Madeja, Wibke Steffen, Ivana Mesic, Bojan Garic, and Boris S Zhorov**

**Supplementary Data**

**Table S1. Nucleotide composition of the Kv1/2/K2.1 chimeras used in the study.**

| Chimera                                               | Nucleotide composition                                                                                                                                       |
|-------------------------------------------------------|--------------------------------------------------------------------------------------------------------------------------------------------------------------|
| Kv2.1 N-Term                                          | nt 1-492 of Kv1.2, nt 571-Stop of Kv2.1                                                                                                                      |
| Kv2.1 S1                                              | nt 1-555 of Kv2.1, nt 480-546 of Kv 1.2, nt 627-Stop of Kv2.1                                                                                                |
| Kv2.1 LS1/S2                                          | nt 1-624 of Kv2.1, nt 547-663 of Kv1.2, nt 685-Stop of Kv2.1                                                                                                 |
| Kv2.1 S2                                              | nt 1-684 of Kv2.1, nt 664-735 of Kv1.2, nt 757-Stop of Kv2.1                                                                                                 |
| Kv2.1 LS2/S3                                          | nt 1-750 of Kv2.1, nt 730-759 of Kv1.2, nt 781-Stop of Kv2.1                                                                                                 |
| Kv2.1 S3                                              | nt 1-774 of Kv2.1, nt 754-843 of Kv1.2, nt 862-Stop of Kv2.1                                                                                                 |
| Kv2.1 LS3/S4                                          | nt 1-840 of Kv2.1, nt 820-879 of Kv1.2, nt 889-Stop of Kv2.1                                                                                                 |
| Kv2.1 S4                                              | nt 1-882 of Kv2.1, nt 874-936 of Kv1.2, nt 946-Stop of Kv2.1                                                                                                 |
| Kv2.1 LS4/S5                                          | nt 1-954 of Kv2.1, nt 946-996 of Kv1.2, nt 1006-Stop of Kv2.1                                                                                                |
| Kv2.1 S5                                              | nt 1-1005 of Kv2.1, nt 997-1035 of Kv1.2, nt 1042-Stop of Kv2.1                                                                                              |
| Kv2.1 LS5/S6                                          | nt 1-1059 of Kv2.1, nt 1051-1164 of Kv1.2, nt 1171-Stop of Kv2.1                                                                                             |
| Kv2.1 LP                                              | nt 1-1059 of Kv2.1, nt 1051-1077 of Kv1.2, nt 1087-1155 of Kv2.1, nt 1147-1164 of Kv1.2, nt 1174-Stop of Kv2.1                                               |
| Kv2.1 S6                                              | nt 1-1182 of Kv2.1, nt 1174-1230 of Kv1.2, nt 1240-Stop of Kv2.1                                                                                             |
| Kv2.1 C-Term                                          | nt 1-1239 of Kv2.1, nt 1231-Stop of Kv1.2                                                                                                                    |
| Kv2.1 AS <sup>39</sup> → DA                           | nt 1-1095 of Kv2.1, nt 1087-1092 of Kv1.2, nt 1102-Stop of Kv2.1                                                                                             |
| Kv2.1 TIT <sup>p46</sup> → VVS                        | nt 1-1113 of Kv2.1, nt 1105-1113 of Kv1.2, nt 1123-Stop of Kv2.1                                                                                             |
| Kv2.1 IY <sup>p56</sup> → MV                          | nt 1-1146 of Kv2.1, nt 1138-1143 of Kv1.2, nt 1153-Stop of Kv2.1                                                                                             |
| Kv2.1 GLCC <sup>i11</sup> → SLCA                      | nt 1-1182 of Kv2.1, nt 1174-1176 of Kv1.2, nt 1186-1191 of Kv2.1, nt 1183-1185 of Kv1.2, nt 1195-Stop of Kv2.1                                               |
| Kv2.1 V <sup>i17</sup> → T                            | nt 1-1209 of Kv2.1, nt 1201-1203 of Kv1.2, nt 1213-Stop of Kv2.1                                                                                             |
| Kv2.1 IPIIVN <sup>i27</sup> → VPVIVS                  | nt 1-1224 of Kv2.1, nt 1216-1218 of Kv1.2, nt 1228-1230 of Kv2.1, nt 1222-1224 of Kv1.2, nt 1234-1239 of Kv2.1, nt 1231-1233 of Kv1.2, nt 1243-Stop of Kv2.1 |
| Kv2.1 SE <sup>i31</sup> → NY                          | nt 1-1248 of Kv2.1, nt 1240-1245 of Kv1.2, nt 1255-Stop of Kv2.1                                                                                             |
| Kv1.2 VVS → TIT <sup>p46</sup>                        | nt 1-1104 of Kv1.2, nt 1102-1110 of Kv2.1, nt 1114-Stop of Kv1.2                                                                                             |
| Kv1.2 MV → IY <sup>p56</sup>                          | nt 1-1137 of Kv1.2, nt 1135-1140 of Kv2.1, nt 1144-Stop of Kv1.2                                                                                             |
| Kv1.2 T → V <sup>i17</sup>                            | nt 1-1200 of Kv1.2, 1198-1200 of Kv2.1, nt 1204-Stop of Kv1.2                                                                                                |
| Kv1.2 VVS → TIT <sup>p46</sup> + T → V <sup>i17</sup> | Nt 1-1104 of Kv1.2, 1102-1110 of Kv2.1, nt 1114-1120 of Kv1.2, nt 1198-1200 of Kv2.1, nt 1204-Stop of Kv1.2                                                  |

The numbers refer to the open reading frame of the respective channel. nt: nucleotide.

**Table S2. Electrophysiological properties of chimeras used in the study under control and with 200  $\mu\text{mol/l}$  flecainide**

| Channel                                          | Control          |                   |             | Flecainide       |                   |             |    |
|--------------------------------------------------|------------------|-------------------|-------------|------------------|-------------------|-------------|----|
|                                                  | $G_{\text{max}}$ | $V_{1/2}$<br>(mV) | $s$<br>(mV) | $G_{\text{max}}$ | $V_{1/2}$<br>(mV) | $s$<br>(mV) |    |
| Kv1.2 wildtype                                   | 0.97 ± 0.00      | -10.2 ± 1.3       | 10.2 ± 1.1  | 0.86 ± 0.02      | -11.8 ± 1.3       | 9.6 ± 1.2   | 13 |
| Kv2.1 wildtype                                   | 0.98 ± 0.00      | 3.5 ± 1.1         | 12.7 ± 0.4  | 0.44 ± 0.03      | -1.7 ± 1.1        | 11.4 ± 0.4  | 16 |
| Kv2.1 N-Term                                     | 1.00 ± 0.00      | 4.0 ± 1.8         | 10.7 ± 0.6  | 0.53 ± 0.02      | 1.3 ± 2.0         | 8.8 ± 0.5   | 12 |
| Kv2.1 S1                                         | 0.98 ± 0.00      | -5.4 ± 0.8        | 19.4 ± 0.2  | 0.39 ± 0.01      | -12.4 ± 1.0       | 17.8 ± 0.3  | 6  |
| Kv2.1 LS1/LS2                                    | 1.24 ± 0.04      | 14.4 ± 3.5        | 35.1 ± 1.1  | 0.66 ± 0.02      | 27.4 ± 4.2        | 39.2 ± 1.8  | 11 |
| Kv2.1 S2                                         | 1.02 ± 0.01      | 6.7 ± 0.9         | 18.6 ± 0.4  | 0.31 ± 0.02      | -7.1 ± 0.8        | 18.5 ± 1.3  | 6  |
| Kv2.1 LS2/LS3                                    | 1.02 ± 0.00      | 18.0 ± 0.9        | 14.7 ± 0.3  | 0.43 ± 0.03      | 14.3 ± 1.2        | 14.1 ± 0.6  | 6  |
| Kv2.1 S3                                         | 1.12 ± 0.01      | 28.5 ± 0.8        | 15.8 ± 0.4  | 0.46 ± 0.04      | 25.2 ± 0.9        | 16.3 ± 0.3  | 6  |
| Kv2.1 LS3/LS4                                    | 1.06 ± 0.01      | 9.3 ± 1.4         | 22.6 ± 0.6  | 0.46 ± 0.03      | 9.4 ± 1.9         | 20.3 ± 2.0  | 10 |
| Kv2.1 S4                                         | 1.04 ± 0.00      | 19.0 ± 0.6        | 15.7 ± 0.2  | 0.54 ± 0.05      | 13.8 ± 1.1        | 14.4 ± 0.2  | 6  |
| Kv2.1 LS4/LS5                                    | 1.04 ± 0.01      | 21.8 ± 1.3        | 10.0 ± 0.5  | 0.50 ± 0.03      | 20.4 ± 2.5        | 16.5 ± 2.5  | 6  |
| Kv2.1 S5                                         | 0.99 ± 0.01      | 15.1 ± 0.6        | 12.3 ± 0.2  | 0.41 ± 0.02      | 6.4 ± 0.6         | 10.4 ± 0.3  | 6  |
| Kv2.1 LS5/LS6                                    | 0.99 ± 0.01      | 6.4 ± 1.4         | 15.8 ± 0.4  | 0.96 ± 0.01      | 6.0 ± 1.2         | 16.0 ± 0.4  | 11 |
| Kv2.1 LP                                         | 0.97 ± 0.01      | -9.5 ± 1.5        | 9.8 ± 0.4   | 0.48 ± 0.01      | -15.5 ± 1.4       | 11.3 ± 0.5  | 7  |
| Kv2.1 S6                                         | 0.93 ± 0.02      | -26.8 ± 0.6       | 13.8 ± 0.6  | 0.86 ± 0.01      | -28.5 ± 0.6       | 13.0 ± 0.5  | 6  |
| Kv2.1 C-Term                                     | 0.96 ± 0.01      | 8.0 ± 1.1         | 10.4 ± 0.2  | 0.47 ± 0.04      | 4.3 ± 1.3         | 9.2 ± 0.5   | 6  |
| Kv2.1 AS <sup>39</sup> →DA                       | 0.99 ± 0.01      | 6.8 ± 1.0         | 11.7 ± 0.5  | 0.40 ± 0.03      | -12.3 ± 1.1       | 12.4 ± 0.4  | 7  |
| Kv2.1 TIT <sup>p46</sup> →VVS                    | 1.03 ± 0.01      | 14.6 ± 0.7        | 15.7 ± 0.6  | 0.74 ± 0.02      | 11.3 ± 1.3        | 14.7 ± 0.4  | 6  |
| Kv2.1 IY <sup>p56</sup> →MV                      | 1.01 ± 0.01      | 9.1 ± 1.4         | 15.3 ± 0.6  | 0.86 ± 0.03      | 6.3 ± 1.6         | 14.6 ± 0.6  | 7  |
| Kv2.1 GLCC <sup>i11</sup> →SLCA                  | 0.98 ± 0.00      | -1.3 ± 1.3        | 4.6 ± 0.5   | 0.34 ± 0.03      | -11.8 ± 1.1       | 12.8 ± 0.5  | 5  |
| Kv2.1 V <sup>i17</sup> →T                        | 1.01 ± 0.01      | 10.4 ± 0.9        | 16.4 ± 0.6  | 0.94 ± 0.02      | 11.2 ± 0.7        | 16.5 ± 0.6  | 6  |
| Kv2.1 IPIIVN <sup>i27</sup> →VPVIVS              | 1.06 ± 0.00      | 11.6 ± 0.4        | 19.5 ± 0.3  | 0.63 ± 0.02      | 9.9 ± 0.8         | 20.5 ± 0.6  | 7  |
| Kv2.1 SE <sup>i31</sup> →NY                      | 0.96 ± 0.00      | -7.6 ± 2.7        | 11.6 ± 0.4  | 0.32 ± 0.02      | -15.1 ± 2.6       | 10.6 ± 0.8  | 6  |
| Kv1.2 VVS→TIT <sup>p46</sup>                     | 0.94 ± 0.00      | -14.5 ± 0.9       | 5.9 ± 0.8   | 0.69 ± 0.03      | -16.5 ± 1.6       | 5.5 ± 1.0   | 5  |
| Kv1.2 MV→IY <sup>p56</sup>                       | 0.96 ± 0.02      | 15.3 ± 2.1        | 11.4 ± 3.6  | 0.86 ± 0.03      | -13.3 ± 2.4       | 12.1 ± 4.0  | 5  |
| Kv1.2 T→V <sup>i17</sup>                         | 0.95 ± 0.02      | -18.3 ± 1.7       | 5.7 ± 0.6   | 0.55 ± 0.07      | -20.0 ± 2.0       | 5.7 ± 0.3   | 6  |
| Kv1.2 VVS→TIT <sup>p46</sup> +T→V <sup>i17</sup> | 0.90 ± 0.02      | 22.6 ± 1.7        | 4.7 ± 0.9   | 0.60 ± 0.04      | -24.2 ± 1.2       | 4.0 ± 0.6   | 7  |

$G_{\text{max}}$  is the normalized maximal conductance,  $V_{1/2}$  is the potential of the half-maximal conductance,  $s$  is the slope factor, and  $n$  is the number of experiments.

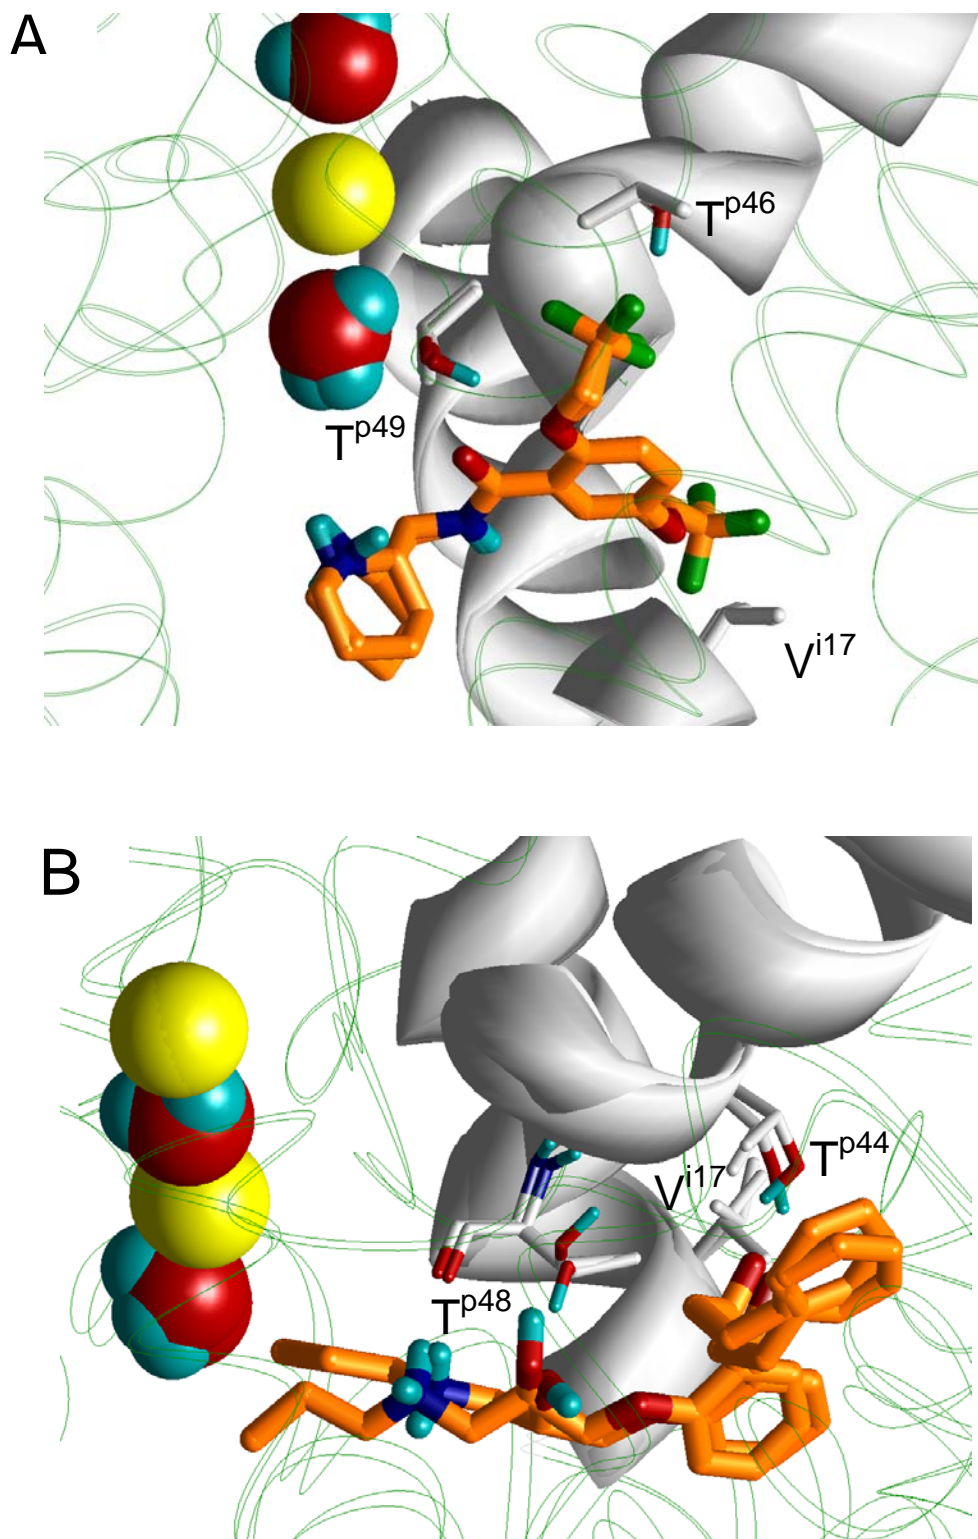

**Figure S1.** Superposition of MC-minimized complexes of Kv2.1 with enantiomers of FLEC (A) and PROP (B). Atoms  $K^+$ , O, N, F, and H are colored yellow, red, blue, green, and cyan, respectively. Carbon atoms are gray in the channel and orange in the ligands. Only polar hydrogens are shown for clarity.
